# Supplementary material for: Degradation of ciprofloxacin by persulfate activated with pyrite: mechanism, acidification and tailwater reuse
Source: Royal Society of Chemistry journal article supplement (doi:10.1039/d2ra05412d), 2022-01-01
Supplement: d2ra05412d1.pdf [file d2ra05412d1.pdf]

## Supplementary Information

### Degradation of ciprofloxacin by persulfate activated with pyrite: mechanism, acidification and tailwater reuse

#### 1. Physicochemical properties of ciprofloxacin

Table S1 Physicochemical properties of ciprofloxacin

| Antibiotic                                       | Ciprofloxacin                                                                       |
|--------------------------------------------------|-------------------------------------------------------------------------------------|
| Molecular formula                                | C <sub>17</sub> H <sub>18</sub> FN <sub>3</sub> O <sub>3</sub>                      |
| Molecular weight                                 | 332.1                                                                               |
| Structural formula                               | 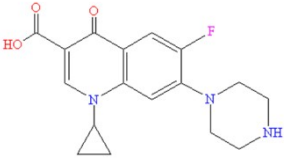 |
| Relative density (water is 1 g/cm <sup>3</sup> ) | 1.461 ± 0.06 g/cm <sup>3</sup>                                                      |
| Solubility in water (25°C)                       | 1.0 mg/mL                                                                           |
| Acidity coefficient (pka)                        | 4.04                                                                                |
| Log <i>K<sub>ow</sub></i> Syracuse <sup>1</sup>  | 0.28                                                                                |
| Log <i>K<sub>ow</sub></i> <sup>2</sup>           | 1.24 ± 0.86                                                                         |

<sup>1</sup>From <http://esc.syrres.com/interkow/estsoft.htm>

<sup>2</sup>Estimated with ACD Log P software(Advanced Chemical Development, Toronto, Canada).

---

9 2. Basic physical and chemical properties of different water substrates

10 Table S2 Physicochemical properties of different water substrates

| Physicochemical<br>property   | Tap water   | River water |
|-------------------------------|-------------|-------------|
| pH                            | 7.75        | 7.96        |
| TOC                           | 44.68 mg/L  | 30.67 mg/L  |
| Na <sup>+</sup>               | 27.44 mg/L  | 140.02 mg/L |
| K <sup>+</sup>                | 1.92 mg/L   | 15.18 mg/L  |
| Ca <sup>2+</sup>              | 77.125 mg/L | 49.21 mg/L  |
| Mg <sup>2+</sup>              | 20.59 mg/L  | 29.56 mg/L  |
| F <sup>-</sup>                | 2.78 mg/L   | 2.88 mg/L   |
| Cl <sup>-</sup>               | 277.76 mg/L | 318.40 mg/L |
| HCO <sub>3</sub> <sup>-</sup> | 148.32 mg/L | 152.50 mg/L |
| NO <sub>3</sub> <sup>-</sup>  | 16.45 mg/L  | 17.53 mg/L  |
| SO <sub>4</sub> <sup>2-</sup> | 104.91 mg/L | 121.69 mg/L |

11 Note: The river water was taken from the Wuma River, Taigu, Jinzhong City, Shanxi

12 Province on November 30, 2021 ( 37°26'56'' N, 112°33'53'' E )

13 3. The removal of CIP by FeS<sub>2</sub> or PS

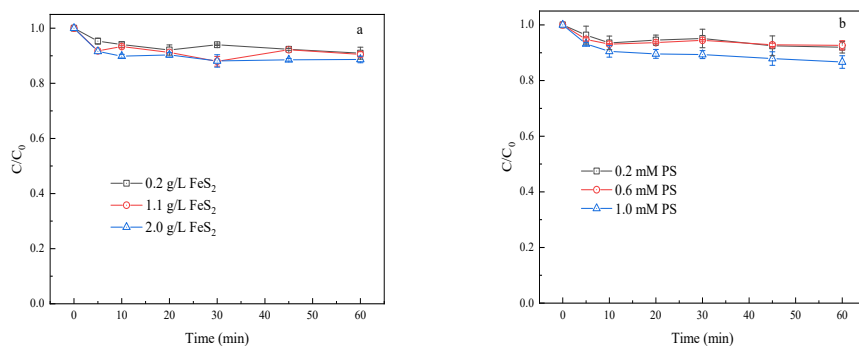

14

15

Fig. S1 The removal of CIP by FeS<sub>2</sub> (a) or PS (b)

16

([CIP]=30  $\mu$ M)

17 4. Ultraviolet and visible spectra of ciprofloxacin before and after FeS<sub>2</sub>/PS processes

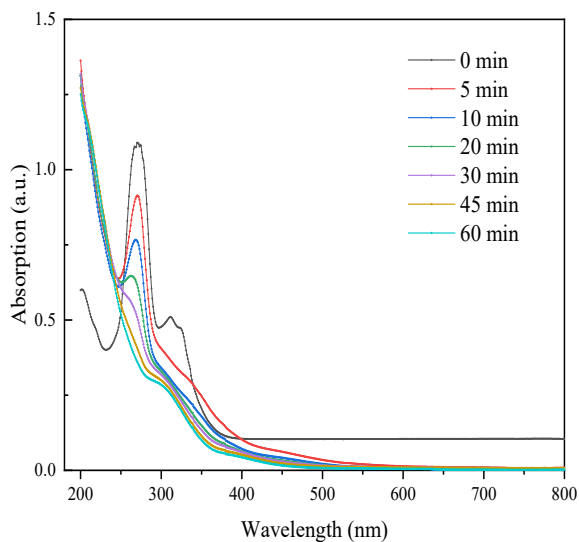

18

19

Fig. S2 Ultraviolet and visible spectra of ciprofloxacin before and after FeS<sub>2</sub>/PS processes.

20

([CIP]=30  $\mu$ M, [FeS<sub>2</sub>]=2.0 g/L, [PS]=1 mM)

---

21 5. The pH before and after the reaction under different pH conditions

22 Table S3 The pH before and after the reaction under different pH conditions

23 ([CIP]=30  $\mu$ M, [FeS<sub>2</sub>]=2.0 g/L, [PS]=1 mM)

| Condition | pH=2 | pH=4 | pH=6 | pH=8 | pH=10 | Control |
|-----------|------|------|------|------|-------|---------|
| Before    | 2.00 | 3.99 | 6.00 | 7.97 | 10.02 | 5.40    |
| After     | 1.98 | 2.94 | 2.94 | 3.07 | 3.06  | 2.93    |

24 6. pH of the control at different reaction times

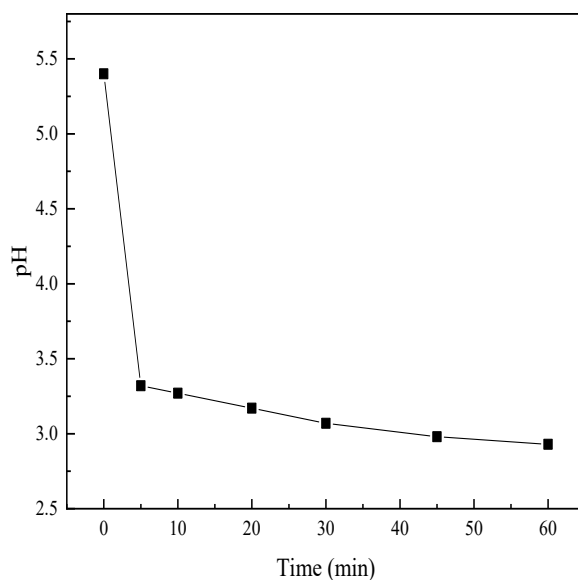

25

26 Fig. S3 pH of the control at different reaction times

27 ([CIP]=30  $\mu$ M, [FeS<sub>2</sub>]=2.0 g/L, [PS]=1 mM)

28

29 7. SEM and EDS spectra of fresh and used pyrite

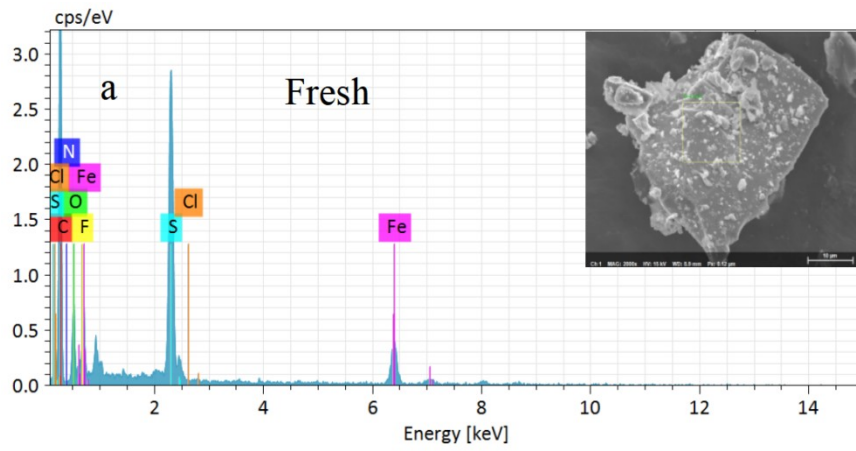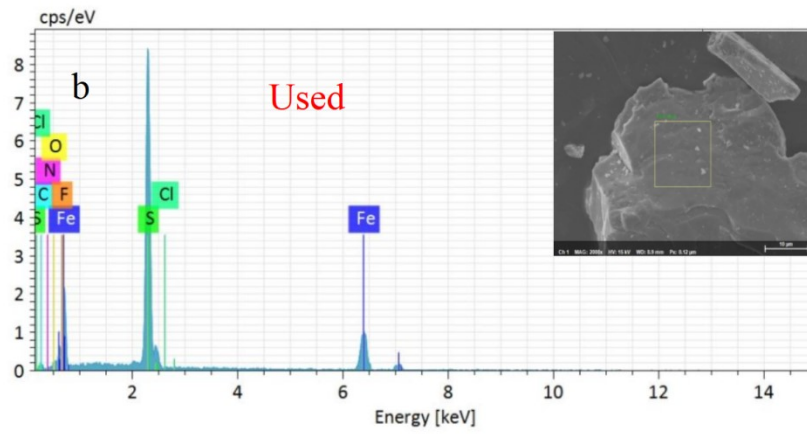

31

32

Fig. S4 SEM and EDS spectra of fresh (a) and used (b) pyrite

33 8. FTIR spectra of fresh and used pyrite

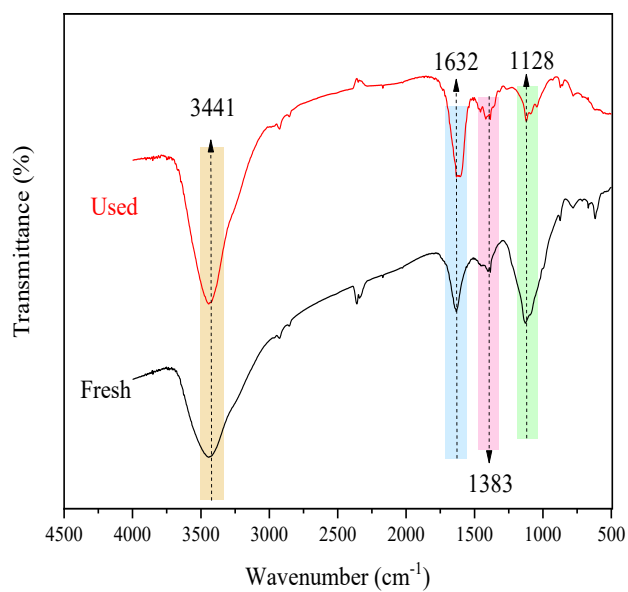

34

35

Fig. S5 FTIR spectra of fresh and used pyrite

36 9. Effect of different water substrates pH=4 on the degradation of CIP by FeS<sub>2</sub>/PS

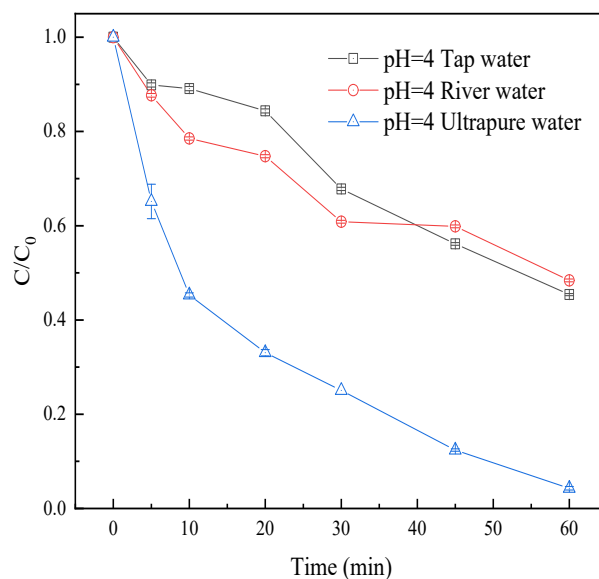

37

38

Fig. S6 Effect of different water substrates pH=4 on the degradation of CIP by FeS<sub>2</sub>/PS

39

([CIP]=30 μM, [FeS<sub>2</sub>]=2.0 g/L, [PS]=1 mM).

40 10. Analysis results of LC-MS (ESI-) degradation products

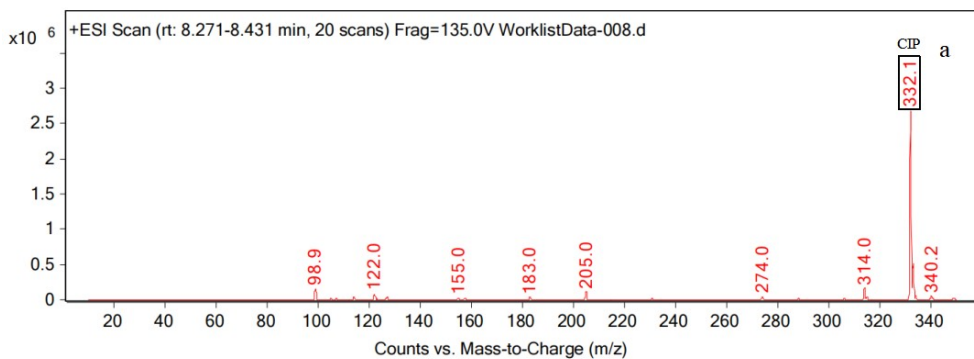

41

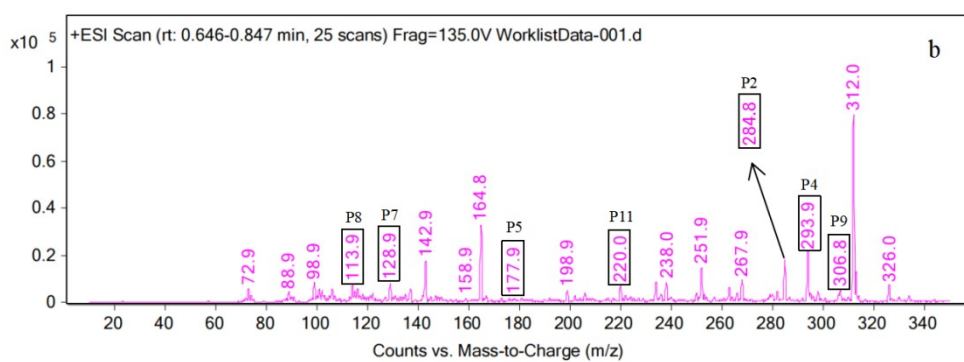

42

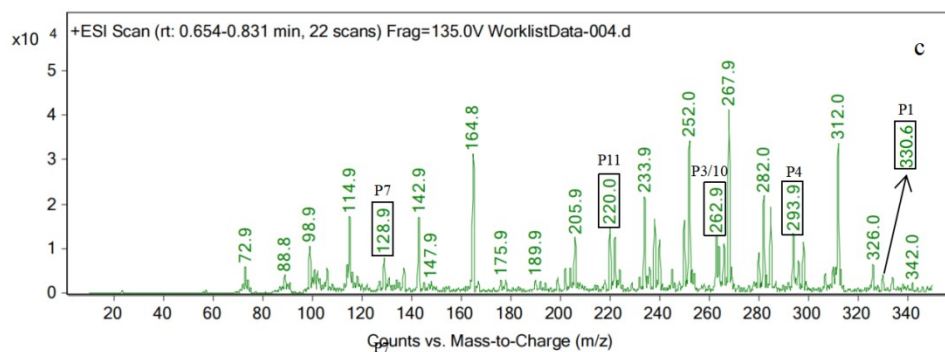

43

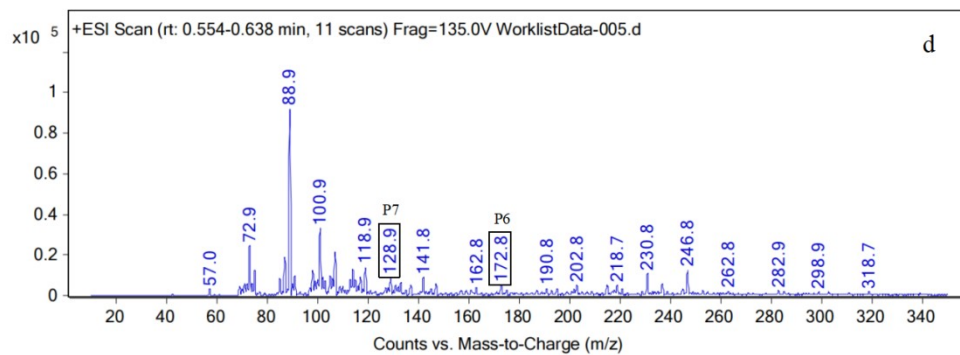

44

45 Fig. S7 Analysis results of LC-MS(ESI-) degradation products at 0 min(a), 15 min(b), 30 min(c),

46 and 60 min(d).

47 11. Intermediates of CIP degradation by FeS<sub>2</sub>/PS system

48 Table S4 Intermediates of CIP degradation by FeS<sub>2</sub>/PS system

| Products | <i>m/z</i> | Structural formula |
|----------|------------|--------------------|
| CIP      | 332.1      |                    |
| P1       | 330.1      |                    |
| P2       | 285.2      |                    |
| P3       | 260.1      |                    |
| P4       | 292.1      |                    |
| P5       | 178.1      |                    |
| P6       | 170.1      |                    |
| P7       | 127.1      |                    |



|     |       |                                                                                    |
|-----|-------|------------------------------------------------------------------------------------|
| P8  | 112.1 | 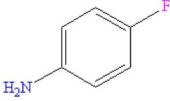 |
| P9  | 306.1 |  |
| P10 | 263.1 |  |
| P11 | 219.1 |  |
